# Supplementary material for: Construction of triple heterogeneous interfaces optimizing electronic structure with B-doped amorphous CoP deposited on crystalline Cu2S/Ni3S2 nanosheets to enhance water electrolysis
Source: Royal Society of Chemistry journal article supplement (doi:10.1039/d3ta08052h), 2024-01-01
Supplement: d3ta08052h1.pdf [file d3ta08052h1.pdf]

## Supporting Information

### **Construction of Triple Heterogeneous Interfaces Optimizing Electronic Structure with B-doped Amorphous CoP Deposited on Crystalline Cu<sub>2</sub>S/Ni<sub>3</sub>S<sub>2</sub> Nanosheets to Enhance Water Electrolysis**

Yajuan Zhang<sup>a,b</sup>, Hui Xu<sup>a\*</sup>, Xingwei Shi<sup>b\*</sup>, Yuanhai Bao<sup>a</sup>, Yong Chen<sup>a</sup>

<sup>a</sup> *Key Laboratory of Low Carbon Energy and Chemical Engineering of Gansu Province, College of Petrochemical Technology, Lanzhou University of Technology, Lanzhou, 730050, China.*

<sup>b</sup> *Beijing Key Laboratory of Ionic Liquids Clean Process, Center of Ionic Liquids and Low Carbon Energy, Institute of Process Engineering, Chinese Academy of Sciences, Beijing, 100190, China.*

\* Corresponding authors.

E-mail addresses: xuhui@lut.edu.cn (H. Xu); xwshi@ipe.ac.cn (X. Shi).

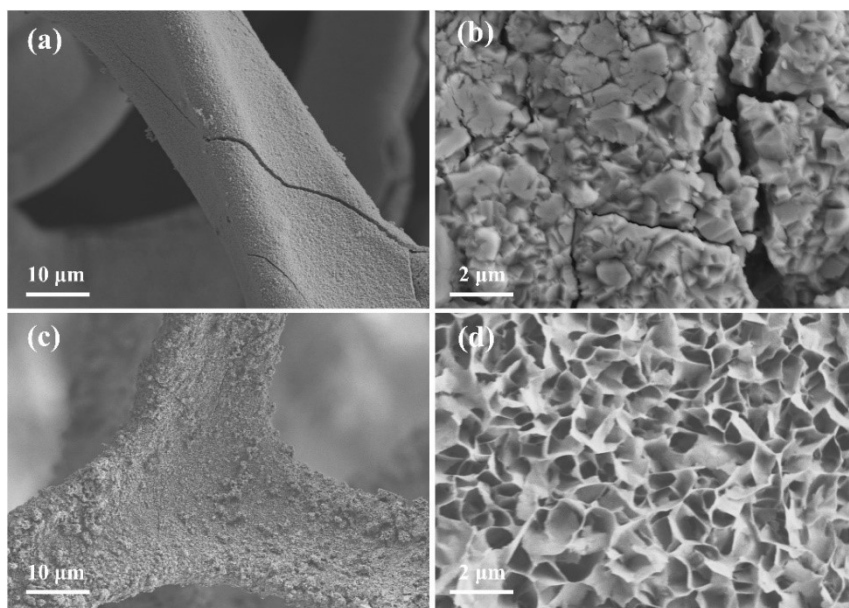

**Figure S1.** The SEM images of (a, b)  $\text{Ni}_3\text{S}_2$  and (c, d)  $\text{Cu}_2\text{S}/\text{Ni}_3\text{S}_2$  on the nickel foam substrate.

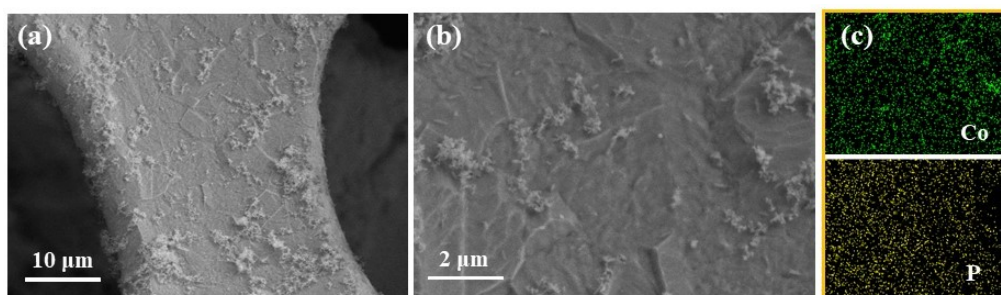

**Figure S2.** The SEM images of (a, b) CoP on the nickel foam substrate by electroless plating technique and (c) corresponding elemental mapping of Co and P.

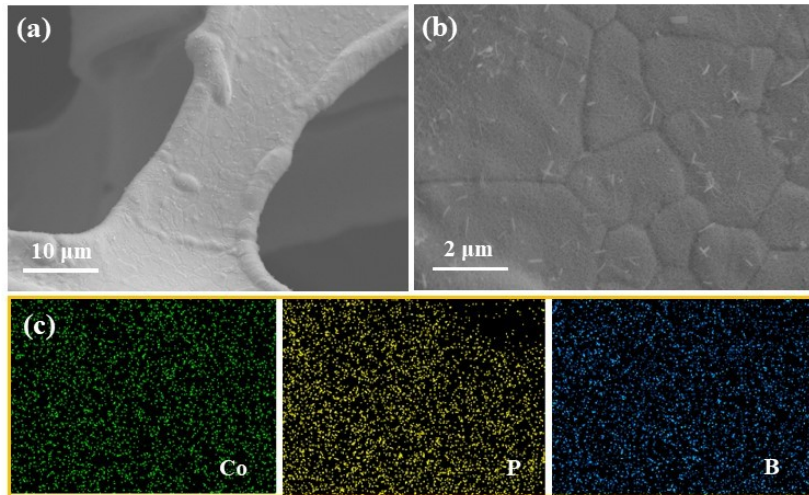

**Figure S3.** The SEM images of (a, b) CoPB on the nickel foam substrate by electroless plating technique and (c) corresponding elemental mapping of Co, P and B.

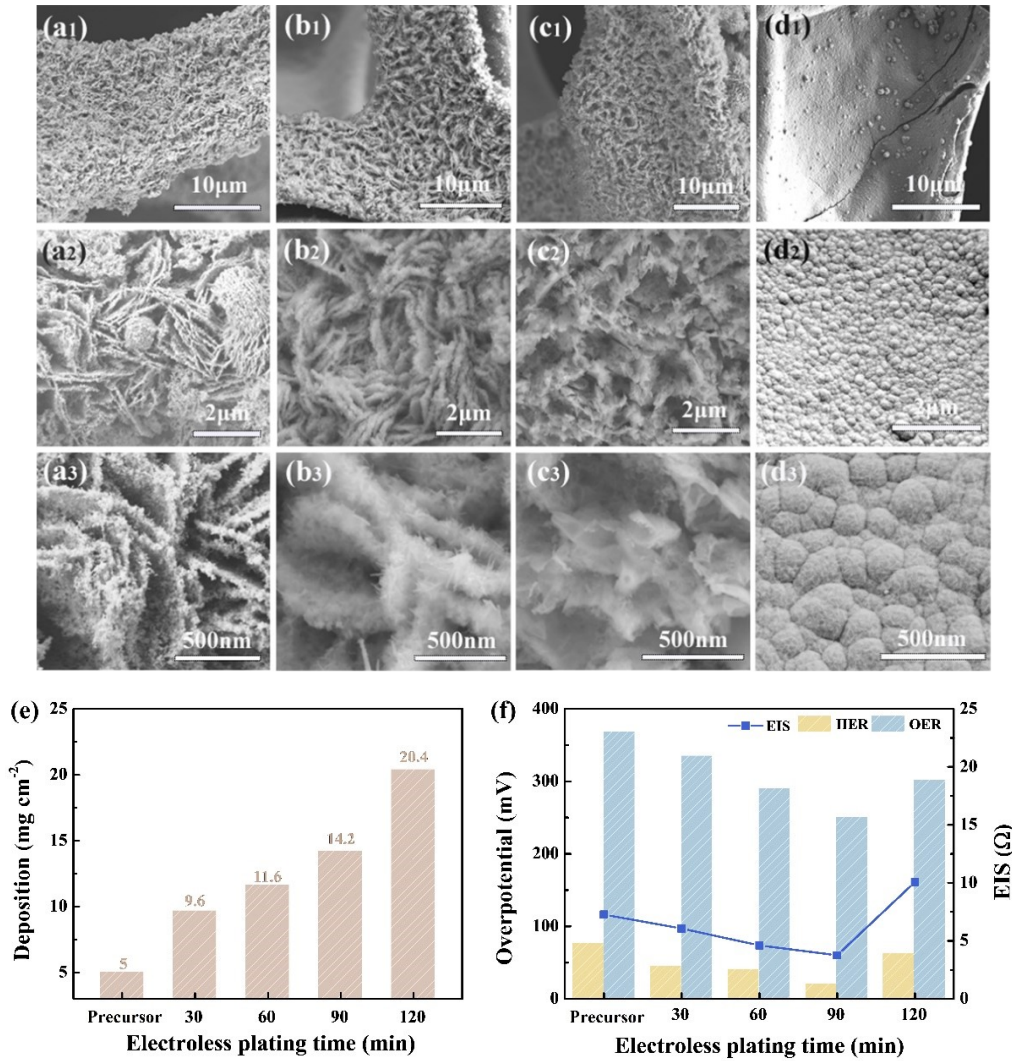

**Figure S4.** The SEM images of CoPB@Cu<sub>2</sub>S/Ni<sub>3</sub>S<sub>2</sub> at different plating times (a<sub>1</sub>-a<sub>3</sub>) 30 min, (b<sub>1</sub>-b<sub>3</sub>) 60 min, (c<sub>1</sub>-c<sub>3</sub>) 90min and (d<sub>1</sub>-d<sub>3</sub>) 120 min. (e) Deposition amount of CoPB@Cu<sub>2</sub>S/Ni<sub>3</sub>S<sub>2</sub> at different time interval. (f) The overpotential of HER and OER for the CoPB@Cu<sub>2</sub>S/Ni<sub>3</sub>S<sub>2</sub> on the nickel foam substrate as well as the EIS values represented by the line plot.

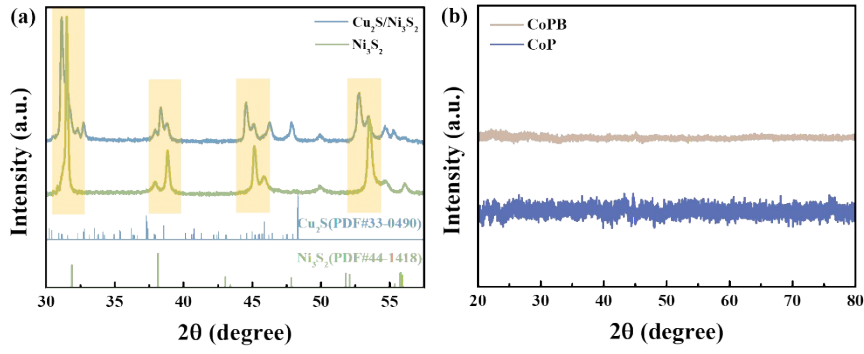

**Figure S5.** XRD patterns and enlarged XRD patterns of (a)  $\text{Ni}_3\text{S}_2$ ,  $\text{Cu}_2\text{S}/\text{Ni}_3\text{S}_2$  and (b)  $\text{CoP}$ ,  $\text{CoPB}$  samples.

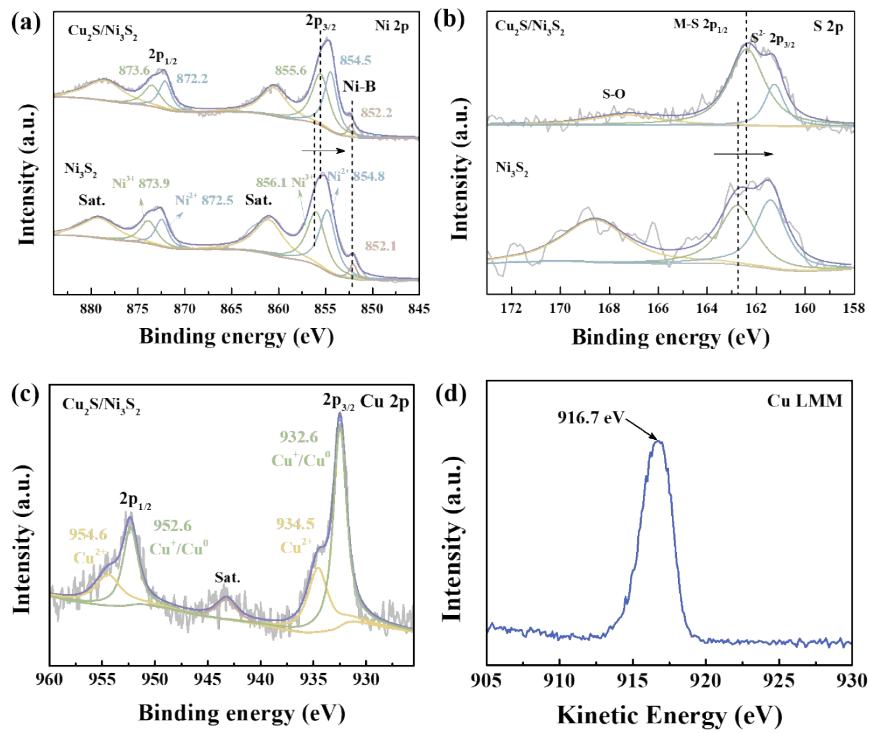

**Figure S6.** The high-resolution XPS spectra of  $\text{Ni}_3\text{S}_2$  and  $\text{Cu}_2\text{S}/\text{Ni}_3\text{S}_2$  (a) Ni 2p, (b) S 2p, (c) Cu 2p and (d) Cu Auger XPS spectra.

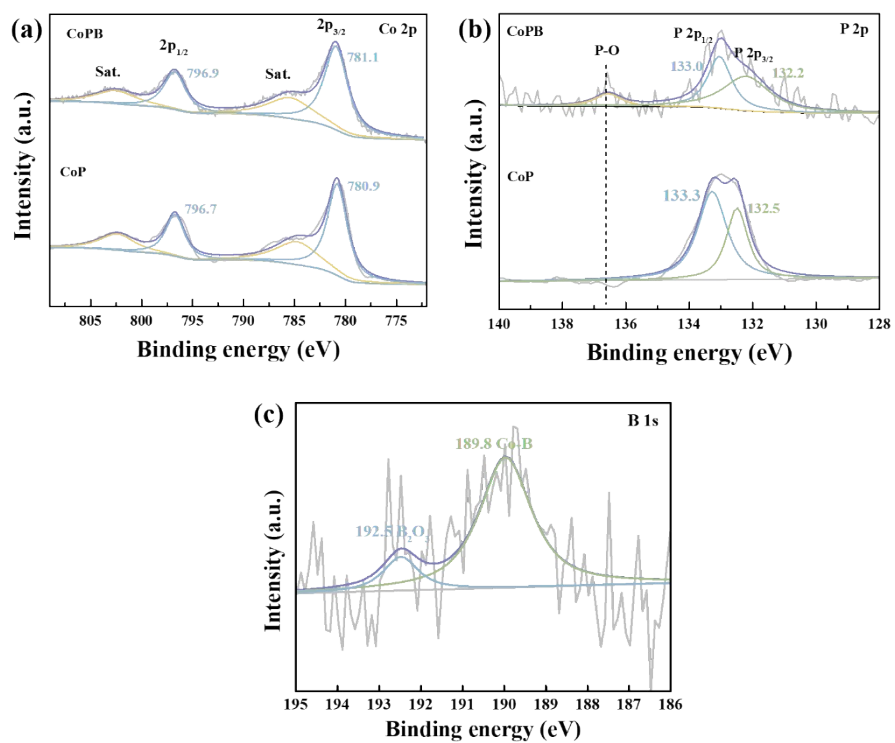

**Figure S7.** The high-resolution XPS spectra of CoP and CoPB (a) Co 2p, (b) P 2p and (c) B 1s.

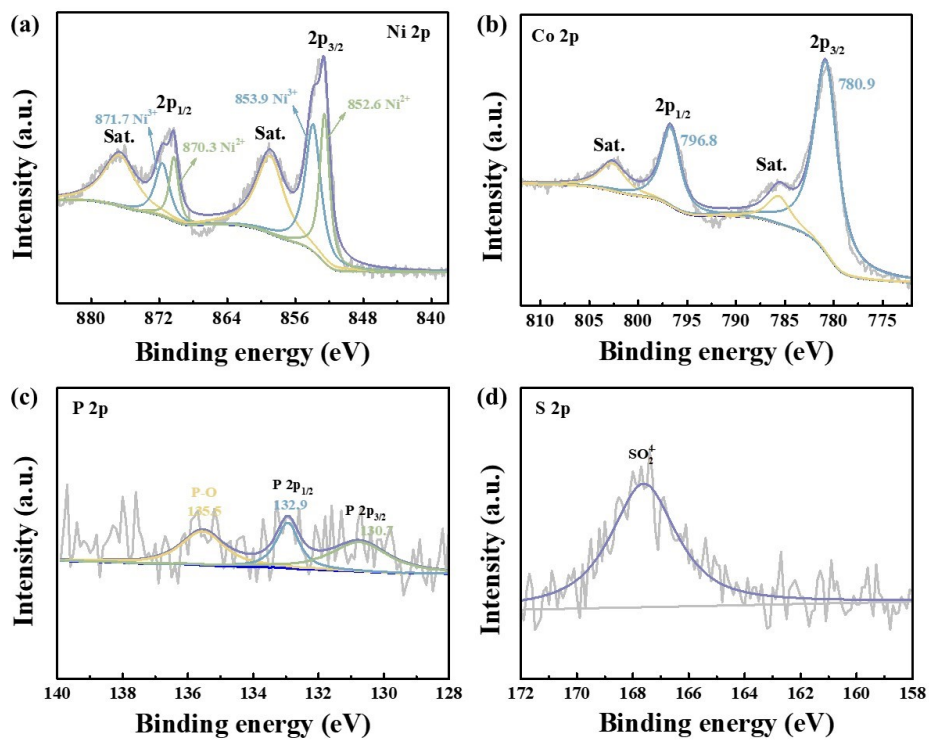

**Figure S8.** The high-resolution XPS spectra of CoP@Ni<sub>3</sub>S<sub>2</sub> (a) Ni 2p, (b) Co 2p, (c) P 2P and (d) S 2P.

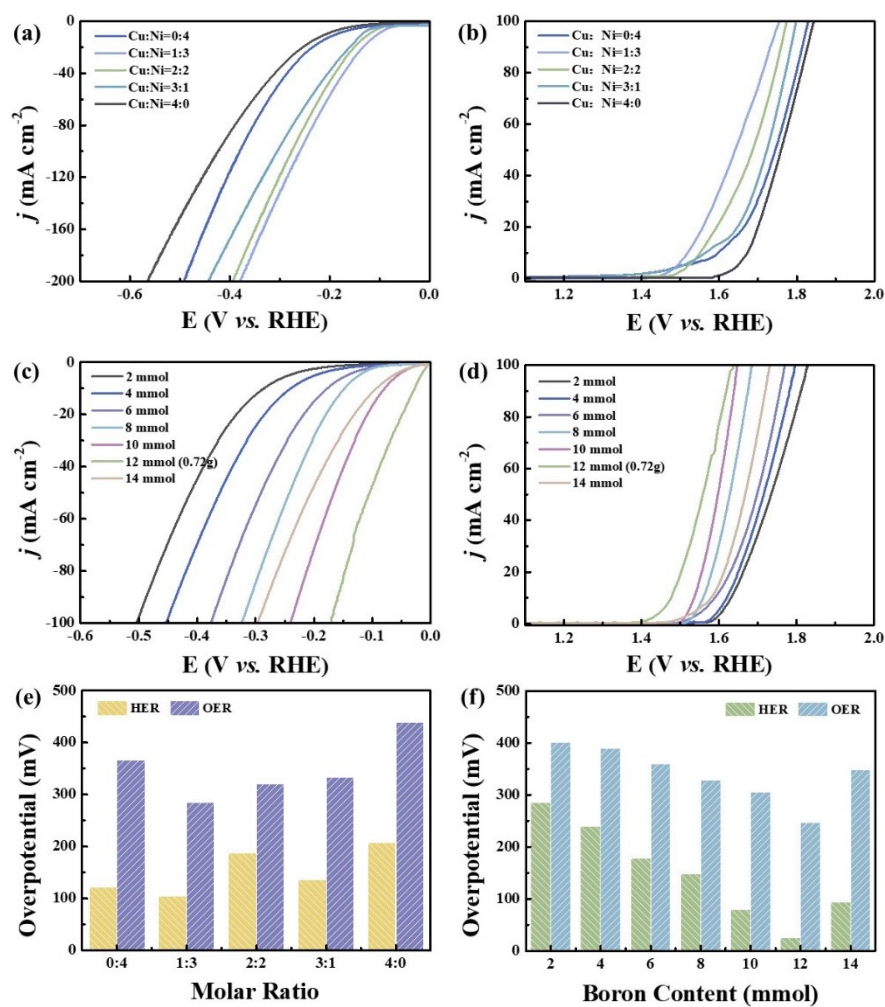

**Figure S9.** The effect of (a, b, e) different metal ratio (Cu: Ni) in precursor Cu<sub>2</sub>S/Ni<sub>3</sub>S<sub>2</sub> and (c, d, f) boron content on CoPB layer on HER and OER performance of CoPB@Cu<sub>2</sub>S/Ni<sub>3</sub>S<sub>2</sub>.



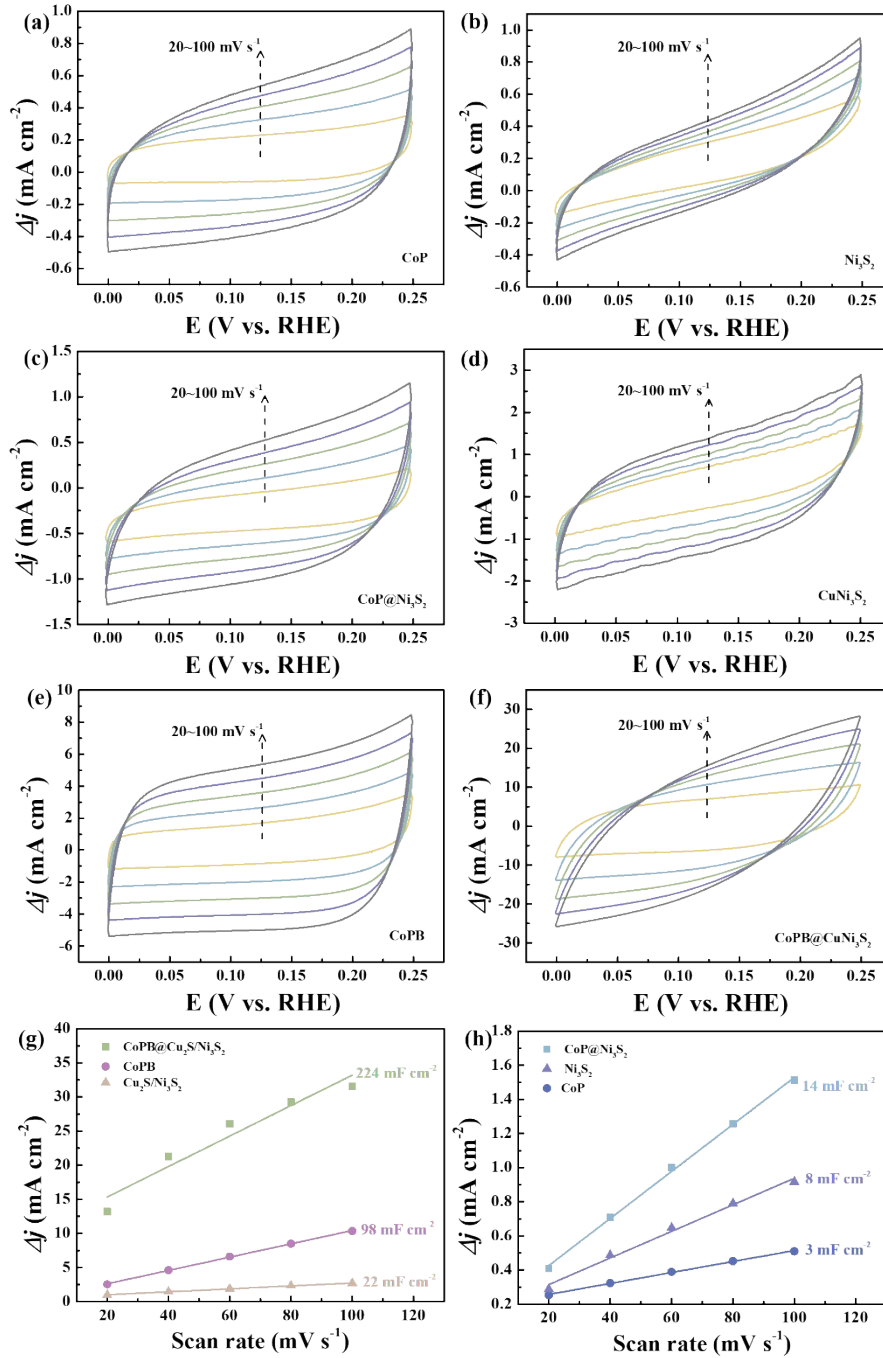

**Figure S10.** Cyclic voltammograms (CV) curves in the non-Faradaic current range at scan rates of 20, 40, 60, 80 and 100 mV s<sup>-1</sup> for HER. (a) CoP, (b) Ni<sub>3</sub>S<sub>2</sub>, (c) CoP@Ni<sub>3</sub>S<sub>2</sub>, (d) Cu<sub>2</sub>S/Ni<sub>3</sub>S<sub>2</sub>, (e) CoPB, (f) CoPB@Cu<sub>2</sub>S/Ni<sub>3</sub>S<sub>2</sub>. (e, f) The corresponding plots of current density as a function of scan rates.

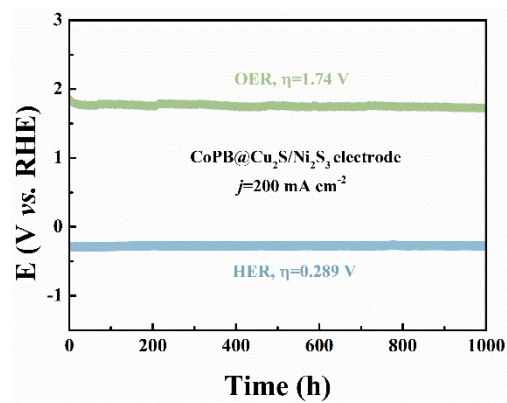

**Figure S11.** Chronopotentiometry test of long-term stability of CoPB@Cu<sub>2</sub>S/Ni<sub>3</sub>S<sub>2</sub> electrodes at the current density of 200 mA cm<sup>-2</sup> for 1000 h.

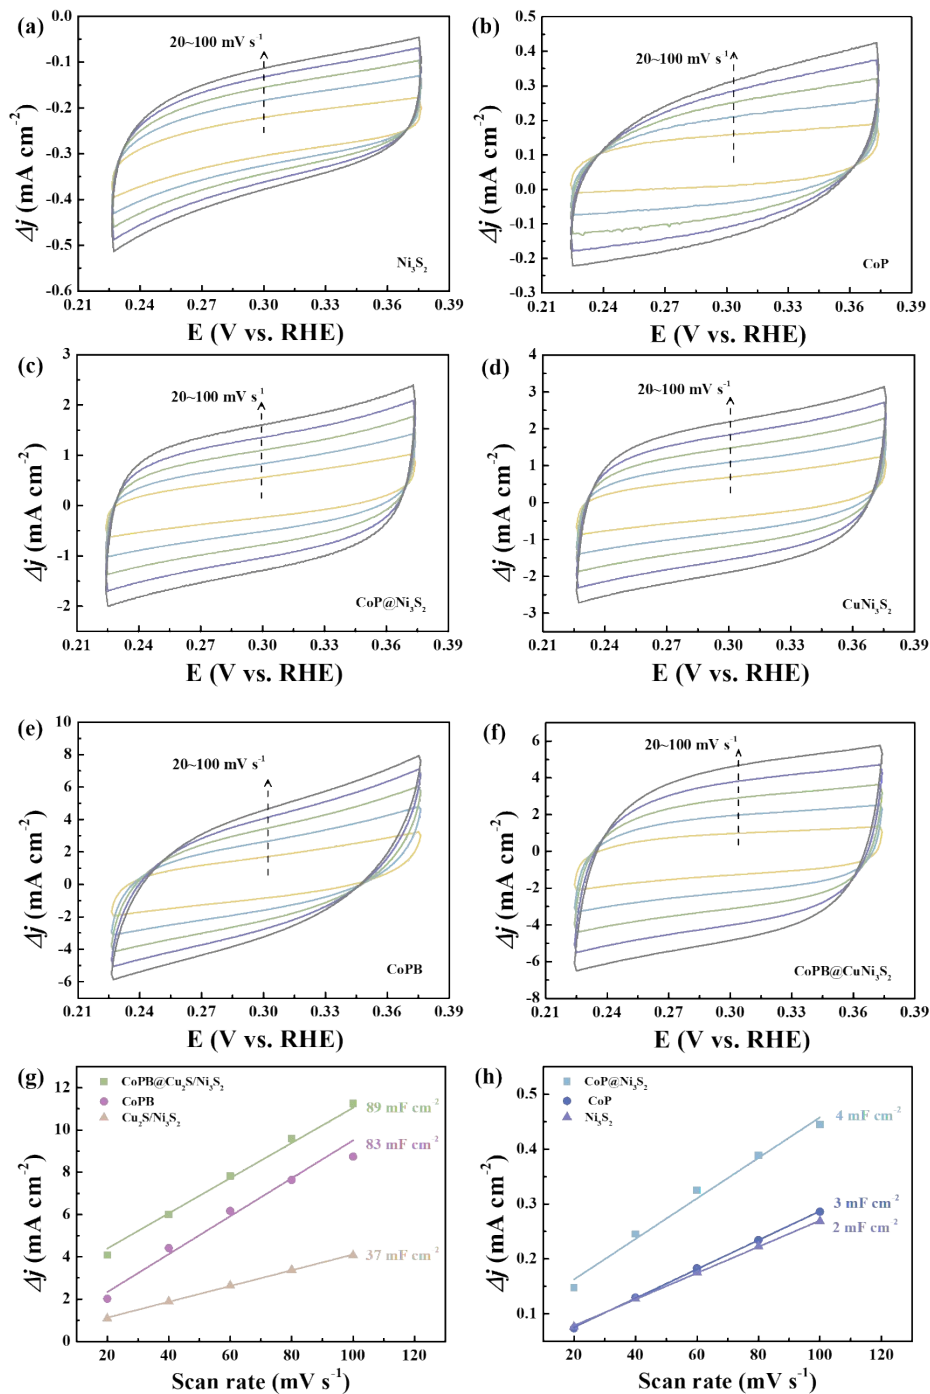

**Figure S12.** Cyclic voltammograms (CV) curves in the non-Faradaic current range at scan rates of 20, 40, 60, 80 and 100 mV s<sup>-1</sup> for OER. (a) CoP, (b) Ni<sub>3</sub>S<sub>2</sub>, (c) CoP@Ni<sub>3</sub>S<sub>2</sub>, (d) Cu<sub>2</sub>S/Ni<sub>3</sub>S<sub>2</sub>, (e) CoPB, (f) CoPB@Cu<sub>2</sub>S/Ni<sub>3</sub>S<sub>2</sub>. (g, h) The corresponding plots of current density as a function of scan rates.

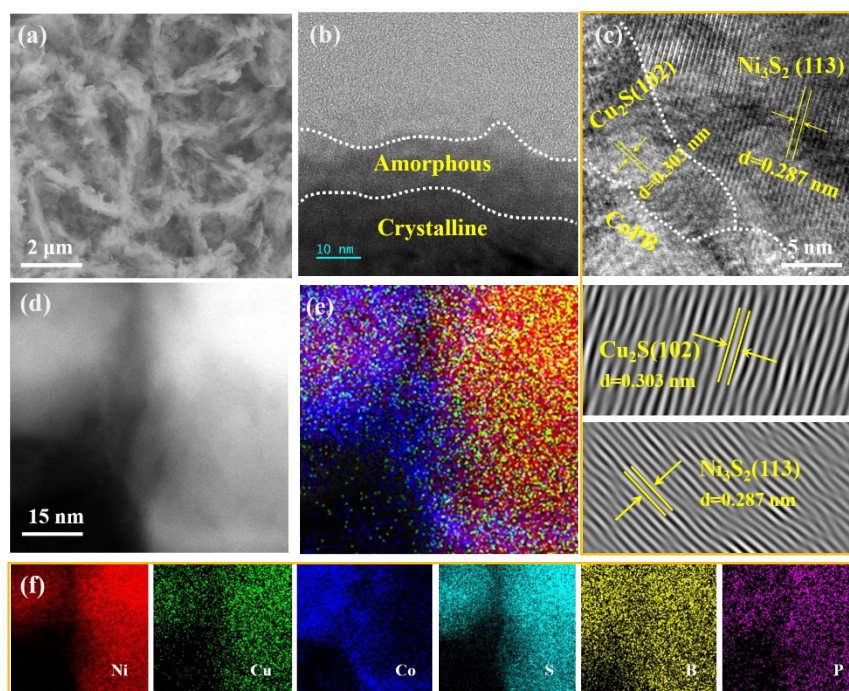

**Figure S13.** The morphology and internal structure of CoPB@Cu<sub>2</sub>S/Ni<sub>3</sub>S<sub>2</sub> electrode after HER stability tests at 10 mA cm<sup>-2</sup>. (a) SEM, (b) TEM, (c) HR-TEM, (d) HADDF-STEM, (e) overlay image and (h) EDX elemental mapping.

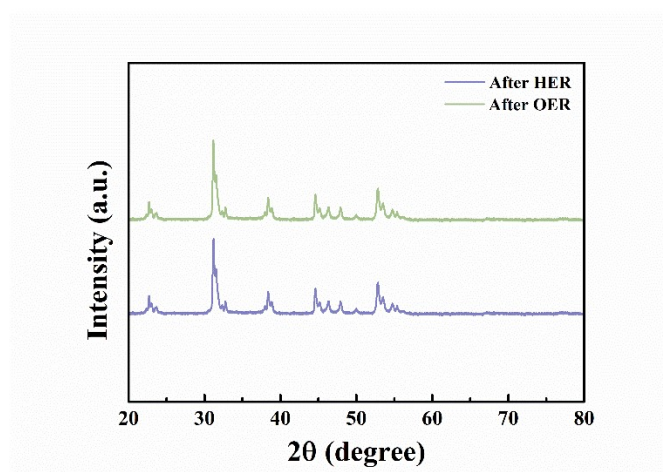

**Figure S14.** The XRD of HER and OER CoPB@Cu<sub>2</sub>S/Ni<sub>3</sub>S<sub>2</sub> electrode after operation at 10 mA cm<sup>-2</sup> for 100 h.

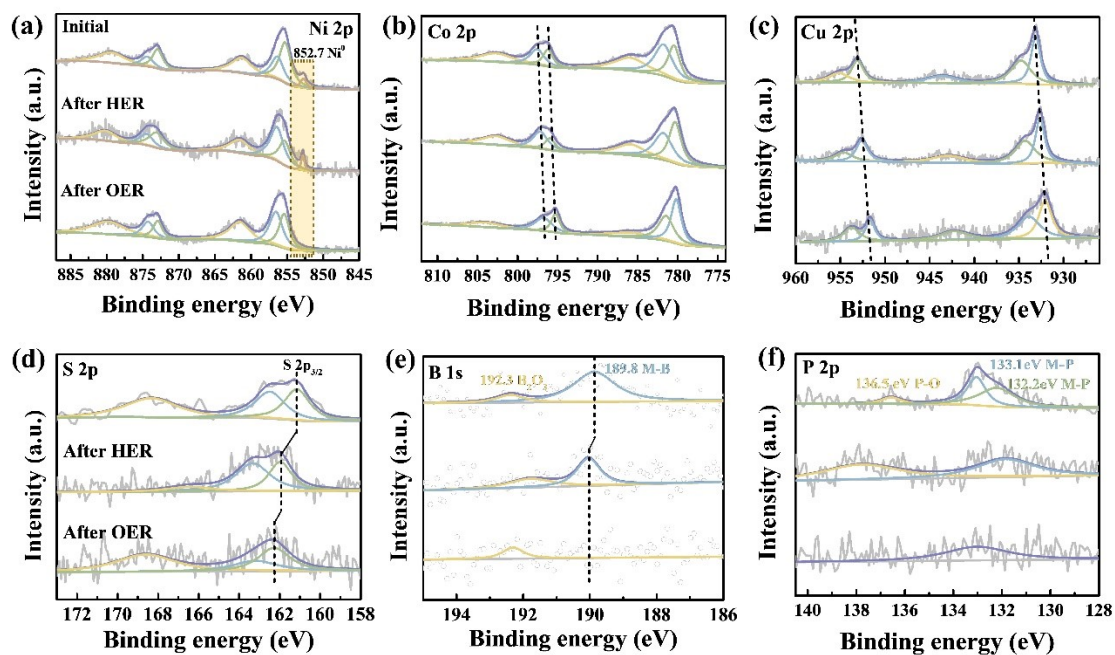

**Figure S15.** High-resolution XPS spectra of (a) Ni 2p, (b) Co 2p, (c) Cu 2p, (d) S 2p, (e) B 1s and (f) P 2p for the CoPB@Cu<sub>2</sub>S/Ni<sub>3</sub>S<sub>2</sub> electrode before and after HER and OER stability tests at 10 mA cm<sup>-2</sup>.

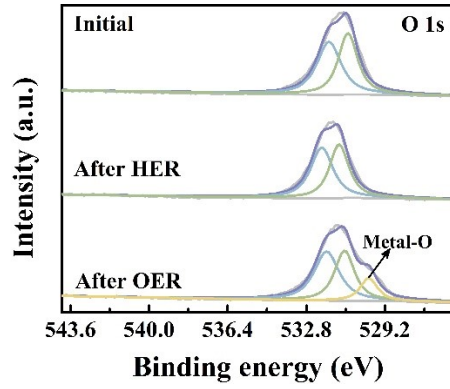

**Figure S16.** High-resolution XPS spectra of O 1s for the CoPB@Cu<sub>2</sub>S/Ni<sub>3</sub>S<sub>2</sub> electrode before and after HER and OER stability tests at 10 mA cm<sup>-2</sup>.

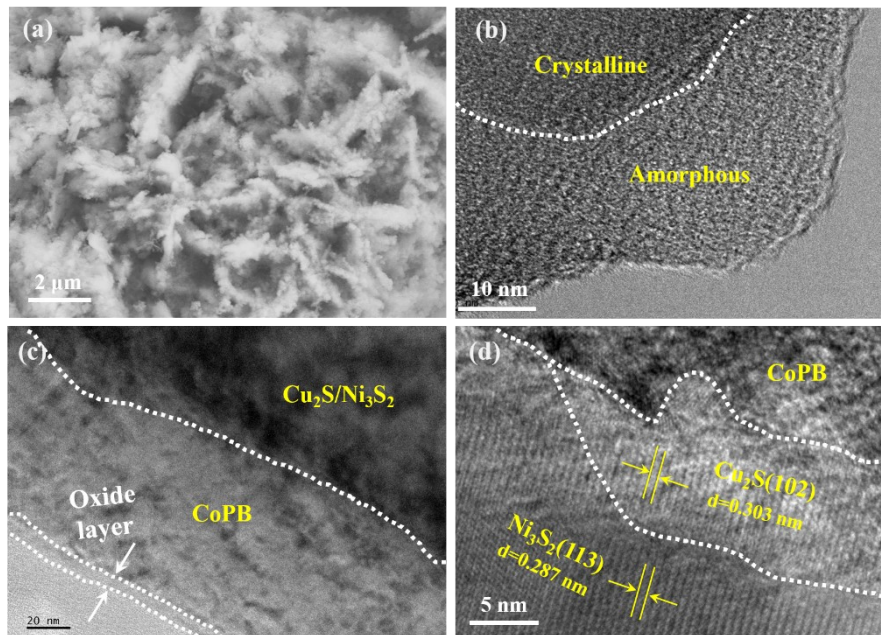

**Figure S17.** The morphology and internal structure of CoPB@Cu<sub>2</sub>S/Ni<sub>3</sub>S<sub>2</sub> electrode after OER stability tests at 10 mA cm<sup>-2</sup>. (a) SEM, (b) TEM and (c, d) HR-TEM images.

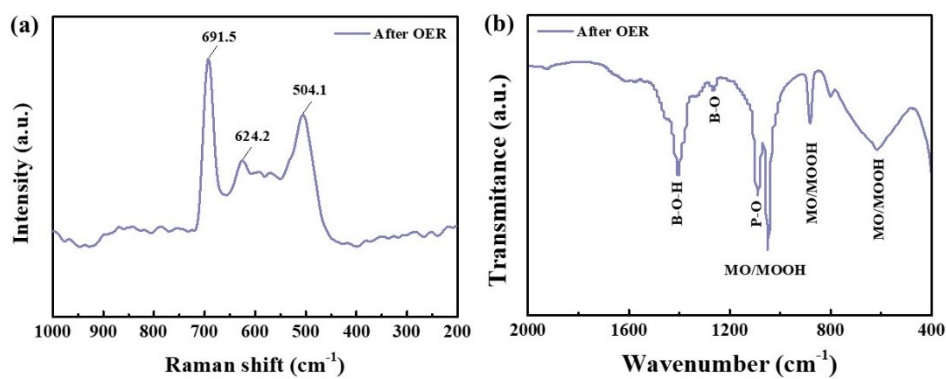

**Figure S18.** (a) Raman and (b) FTIR spectra of CoPB@Cu<sub>2</sub>S/Ni<sub>3</sub>S<sub>2</sub> after OER test.

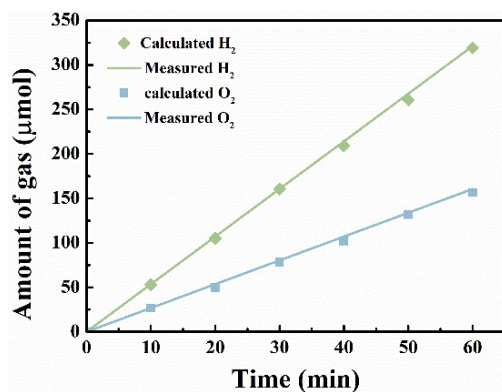

**Figure S19.** Amount of gas theoretically calculated and experimentally measured versus time for CoPB@Cu<sub>2</sub>S/Ni<sub>3</sub>S<sub>2</sub>||CoPB@Cu<sub>2</sub>S/Ni<sub>3</sub>S<sub>2</sub>.

Table S1 The resistance ( $R_s$ ) of CoPB@Cu<sub>2</sub>S/Ni<sub>3</sub>S<sub>2</sub> sample at different deposition.

| Catalyst                                              | $R_s$ ( $\Omega \cdot \text{sq}^{-1}$ ) |       |       |        |
|-------------------------------------------------------|-----------------------------------------|-------|-------|--------|
|                                                       | 30min                                   | 60min | 90min | 120min |
| CoPB@Cu <sub>2</sub> S/Ni <sub>3</sub> S <sub>2</sub> | 1.451                                   | 1.406 | 1.195 | 1.654  |

Table S2 ICP-AES analysis of electrocatalysts under different deposition times.

| Catalyst                                                      | wt%  |      |      |      |     |       |
|---------------------------------------------------------------|------|------|------|------|-----|-------|
|                                                               | Cu   | Ni   | S    | Co   | P   | B     |
| Cu <sub>2</sub> S/Ni <sub>3</sub> S <sub>2</sub>              | 16.1 | 71.4 | 12.3 | -    | -   | -     |
| CoPB                                                          | -    | -    | -    | 92.3 | 5.4 | 2.231 |
| CoPB@Cu <sub>2</sub> S/Ni <sub>3</sub> S <sub>2</sub> -30min  | 5.5  | 84.7 | 3.7  | 5.3  | 0.3 | 0.265 |
| CoPB@Cu <sub>2</sub> S/Ni <sub>3</sub> S <sub>2</sub> -60min  | 8.2  | 79.5 | 3.1  | 8.0  | 0.4 | 0.345 |
| CoPB@Cu <sub>2</sub> S/Ni <sub>3</sub> S <sub>2</sub> -90min  | 11.6 | 73.9 | 3.8  | 9.5  | 0.6 | 0.410 |
| CoPB@Cu <sub>2</sub> S/Ni <sub>3</sub> S <sub>2</sub> -120min | 12.0 | 69.0 | 4.6  | 12.3 | 0.9 | 0.541 |

Table S3 EXAFS data fitting results of CoPB@Cu<sub>2</sub>S/Ni<sub>3</sub>S<sub>2</sub>.

| Sample    | Path     | $CN^a$ | $R(\text{\AA})^b$ | $\sigma^2(\text{\AA}^2)^c$ | $\Delta E_0(\text{eV})^d$ | $R$ factor |
|-----------|----------|--------|-------------------|----------------------------|---------------------------|------------|
| sample-Co | Co-P/B   | 4.4    | 2.25              | 1.4                        | -10.4                     | 0.09       |
|           | Co-Co/Cu | 6.4    | 2.43              | 14                         | -10.4                     |            |
| sample-Cu | Cu-S     | 3.3    | 2.25              | 0.6                        | 2.2                       | 0.3        |
|           | Cu-Ni/Co | 6.3    | 2.61              | 2.9                        | 2.2                       |            |
| sample-Ni | Ni-S     | 4.2    | 2.26              | 0.0125                     | -11.8                     | 0.0111     |
|           | Ni-Ni/Cu | 6.9    | 2.50              | 0.0124                     | -5.3                      |            |

<sup>a</sup> $CN$ , coordination number; <sup>b</sup> $R$ , the distance between absorber and backscatter atoms; <sup>c</sup> $\sigma^2$ , the Debye Waller factor value; <sup>d</sup> $\Delta E_0$ , inner potential correction to account for the difference in the inner potential between the sample and the reference compound;  $R$  factor indicates the goodness of the fit.  $S_0^2$  was fixed to 0.804, according to the experimental EXAFS fit of Ni foil by fixing  $CN$  as the known crystallographic value. \* This value was fixed during EXAFS fitting, based on the known structure of Ni. Fitting conditions:  $k$  range: 3.0-12.5;  $R$  range: 1.0-3.0; fitting space: R space;  $k$ -weight = 3. A reasonable range of EXAFS fitting parameters:  $0.800 < S_0^2 < 1.000$ ;  $CN > 0$ ;  $\sigma^2 > 0 \text{\AA}^2$ ;  $|\Delta E_0| < 15 \text{ eV}$ ;  $R$  factor  $< 0.02$ .



Table S4 comparisons of CoPB@Cu<sub>2</sub>S/Ni<sub>3</sub>S<sub>2</sub> and other electrocatalysts for electrochemical water splitting in 1.0 M KOH.

| Catalysts                                                                           | substrate | <i>j</i><br>(mA cm <sup>-2</sup> ) | $\eta$ (mV) |            | Voltages<br>(V) | Reference        |
|-------------------------------------------------------------------------------------|-----------|------------------------------------|-------------|------------|-----------------|------------------|
|                                                                                     |           |                                    | HER         | OER        |                 |                  |
| <b>CoPB@Cu<sub>2</sub>S/Ni<sub>3</sub>S<sub>2</sub></b>                             | NF        | <b>10</b>                          | <b>25</b>   | <b>247</b> | <b>1.44</b>     | <b>This work</b> |
| Co <sub>2</sub> Mo <sub>1</sub> S <sub>x</sub>                                      | NF        | 10                                 | 146         | 276        | 1.52            | 1                |
| CNS/LDH/NF                                                                          | NF        | 10                                 | 161         | 230        | 1.63            | 2                |
| SnFeS <sub>x</sub> O <sub>y</sub> /NF                                               | NF        | 10                                 | 85          | -          | -               | 3                |
| CoS <sub>x</sub> /Ni <sub>3</sub> S <sub>2</sub> @NF                                | NF        | 10                                 | 204         | 280        | 1.57            | 4                |
| Bi <sub>2</sub> S <sub>3</sub> /Ni <sub>3</sub> S <sub>2</sub> /NF                  | NF        | 10                                 | -           | 268        | -               | 5                |
| H-Fe-CoMoS                                                                          | NF        | 10                                 | 137         | 282        | 1.60            | 6                |
| Ag <sub>2</sub> S-NiS <sub>x</sub>                                                  | NF        | 10                                 | 230         | 260        | 1.68            | 7                |
| Ni <sub>3</sub> (BO <sub>3</sub> ) <sub>2</sub> -Ni <sub>3</sub> S <sub>2</sub> /NF | NF        | 10                                 | 92          | 217        | 1.49            | 8                |
| NiS <sub>2</sub> /MoS <sub>2</sub> -2                                               | NF        | 10                                 | 90          | 270        | -               | 9                |
| LMOS-4                                                                              | NF        | 10                                 | 109         | 300        | 1.50            | 10               |
| Mo-NiS/Ni <sub>3</sub> S <sub>2</sub> -S <sub>v</sub>                               | NF        | 10                                 | 73          | -          | -               | 11               |
| Co <sub>x</sub> P@Ni-Co-S/NF                                                        | NF        | 50                                 | -           | 271        | -               | 12               |
| Ni <sub>3</sub> S <sub>2</sub> /NiCo <sub>2</sub> S <sub>4</sub> /NF                | NF        | 100                                | -           | 330        | -               | 13               |
| CoMoP/CoP/NF                                                                        | NF        | 100                                | 127         | 308        | -               | 14               |
| Ni <sub>2</sub> P@CoP                                                               | CC        | 10                                 | 55          | -          | -               | 15               |
| CoMoNiP/Cu <sub>3</sub> P-5                                                         | CF        | 100                                | 106         | 243        | 1.65            | 16               |
| NiFeP <sub>x</sub> @NiCo <sub>2</sub> P <sub>x</sub>                                | NF        | 10                                 | 97          | 230        | 1.56            | 17               |
| CoP-FeP                                                                             | CC        | 10                                 | 71          | 250        | -               | 18               |
| Fe <sub>2</sub> P/Ni <sub>2</sub> P                                                 | NF        | 10                                 | 64          | 185        | 1.49            | 19               |
| Mn-CoP/NiPO                                                                         | CC        | 10                                 | 116         | 245        | -               | 20               |
| Cu-NiP <sub>x</sub> /NiSe <sub>y</sub>                                              | NF        | 10                                 | 69          | -          | -               | 21               |
| Co@CoP <sub>2</sub>                                                                 | CF        | 10                                 | 55          | 210        | 1.54            | 22               |
| NiCo/NiCoP                                                                          | NF        | 10                                 | -           | 290        | -               | 23               |
| NiCoP/NiCoS <sub>x</sub>                                                            | NF        | 10                                 | 68          | -          | -               | 24               |
| V-CNS/P/NF                                                                          | NF        | 10                                 | 38          | 210        | 1.56            | 25               |
| F-NiP <sub>x</sub> /Ni <sub>3</sub> S <sub>2</sub> -NF                              | NF        | 100                                | 182         | 370        | 1.55            | 26               |
| Mo-NiP <sub>x</sub> /NiS <sub>y</sub>                                               | NF        | 10                                 | 85          | 137        | 1.42            | 27               |
| Co <sub>0.68</sub> Fe <sub>0.32</sub> P                                             | -         | 10                                 | 116         | 240        | -               | 28               |
| NiFeSP/NF                                                                           | NF        | 10                                 | 91          | -          | -               | 29               |

Table S5 HER intrinsic activity (TOF) parameters for developing each electrocatalysts was investigated in 1 M KOH.

| Catalyst                                              | $C_{dl}$ (mF cm <sup>-2</sup> ) | ESCA (cm <sup>2</sup> ) | Turnover frequency<br>TOF (s <sup>-1</sup> ) |
|-------------------------------------------------------|---------------------------------|-------------------------|----------------------------------------------|
| CoPB@Cu <sub>2</sub> S/Ni <sub>3</sub> S <sub>2</sub> | 224                             | 3733.3                  | 1.32                                         |
| CoPB                                                  | 98                              | 1633.3                  | 0.96                                         |
| Cu <sub>2</sub> S/Ni <sub>3</sub> S <sub>2</sub>      | 22                              | 366.7                   | 0.92                                         |
| CoP@Ni <sub>3</sub> S <sub>2</sub>                    | 14                              | 233.3                   | 0.81                                         |
| Ni <sub>3</sub> S <sub>2</sub>                        | 8                               | 133.3                   | 0.25                                         |
| CoP                                                   | 3                               | 50                      | 0.15                                         |

Table S6 EIS parameters were calculated of HER and OER electrodes via fitting equivalent circuit.

| Catalysts                                             |     | $R_s$ ( $\Omega$ ) | $R_{ct}$ ( $\Omega$ ) |
|-------------------------------------------------------|-----|--------------------|-----------------------|
| CoPB@Cu <sub>2</sub> S/Ni <sub>3</sub> S <sub>2</sub> | HER | 1.10               | 1.07                  |
|                                                       | OER | 1.36               | 2.31                  |
| CoPB                                                  | HER | 1.14               | 2.92                  |
|                                                       | OER | 1.48               | 3.23                  |
| Cu <sub>2</sub> S/Ni <sub>3</sub> S <sub>2</sub>      | HER | 1.11               | 6.21                  |
|                                                       | OER | 1.47               | 3.43                  |
| CoP@Ni <sub>3</sub> S <sub>2</sub>                    | HER | 1.06               | 8.35                  |
|                                                       | OER | 1.51               | 4.48                  |
| Ni <sub>3</sub> S <sub>2</sub>                        | HER | 1.32               | 8.61                  |
|                                                       | OER | 1.57               | 4.32                  |
| CoP                                                   | HER | 1.11               | 8.41                  |
|                                                       | OER | 1.53               | 6.89                  |

Table S7 OER intrinsic activity (TOF) parameters for developing each electrocatalysts was investigated in 1 M KOH.

| Catalyst                                              | $C_{dl}$ (mF cm <sup>-2</sup> ) | ESCA (cm <sup>2</sup> ) | Turnover frequency TOF (s <sup>-1</sup> ) |
|-------------------------------------------------------|---------------------------------|-------------------------|-------------------------------------------|
| CoPB@Cu <sub>2</sub> S/Ni <sub>3</sub> S <sub>2</sub> | 89                              | 1483.3                  | 0.210                                     |
| CoPB                                                  | 83                              | 1383.3                  | 0.151                                     |
| Cu <sub>2</sub> S/Ni <sub>3</sub> S <sub>2</sub>      | 37                              | 616.7                   | 0.115                                     |
| CoP@Ni <sub>3</sub> S <sub>2</sub>                    | 4                               | 66.7                    | 0.057                                     |
| CoP                                                   | 3                               | 50                      | 0.054                                     |
| Ni <sub>3</sub> S <sub>2</sub>                        | 2                               | 33.3                    | 0.039                                     |

Table S8 A summary of AEM cell performance in 1M KOH based on published research.

| Catalysts                                                                                                         | j (mA cm <sup>-2</sup> ) | Voltages (V) | Reference                                               |
|-------------------------------------------------------------------------------------------------------------------|--------------------------|--------------|---------------------------------------------------------|
| CoPB@Cu <sub>2</sub> S/Ni <sub>3</sub> S <sub>2</sub>   <br>CoPB@Cu <sub>2</sub> S/Ni <sub>3</sub> S <sub>2</sub> | 1000/2000                | 1.8/1.9      | <b>This work</b>                                        |
| CM  CMOH-5x                                                                                                       | 1000                     | 2.2          | ACS Appl. Mater. Interfaces 2023, <b>15</b> , 9231-9239 |
| NiCoOx:Fe  NiCoOx:Fe                                                                                              | 1000                     | 2.4          | ACS Catalysis, 2019, <b>9</b> , 7-15                    |
| CoSb <sub>2</sub> O <sub>6</sub>   CoSb <sub>2</sub> O <sub>6</sub>                                               | 800                      | 1.9          | ACS Energy Lett. 2021, <b>6</b> , 364-370               |
| M-Mo-CoP/(CF)  NiFe-LDH/(IF)                                                                                      | 1000                     | 1.8          | Electrochim. Acta 2023, <b>472</b> , 143429             |
| NiFe_FA_NN  NiFeP_FA_NN                                                                                           | 500                      | 2.14         | Appl. Catal. B: Environ. 2023, <b>322</b> , 122101      |
| Mo-NiS  Mo-NiS                                                                                                    | 1000                     | 2.0          | Adv. Funct. Mater. 2023, <b>33</b> , 2210656            |
| CuNi@NiSe  CuNi@NiSe                                                                                              | 1000                     | 2.2          | Small 2023, <b>19</b> , 2301613                         |
| IrO <sub>2</sub>   RuSe <sub>2</sub>                                                                              | 730                      | 1.8          | Small 2021, <b>17</b> , 2007333                         |
| Ru-Ru <sub>2</sub> P/V <sub>2</sub> CTx  RuO <sub>2</sub>                                                         | 1000/2000                | 1.80/2.05    | Appl. Catal. B: Environ. 2024, <b>343</b> , 123517      |

## References

- (1) Shit, S.; Chhetri, S.; Bolar, S.; Murmu, N. C.; Jang, W.; Koo, H.; Kuila, T. Hierarchical Cobalt Sulfide/Molybdenum Sulfide Heterostructure as Bifunctional Electrocatalyst towards Overall Water Splitting. *ChemElectroChem* **2019**, *6*, 430-438.
- (2) Zhang, W.; Wang, S.; Wang, Z.; Cao, G.; Zhang, P.; Liu, C. Constructing the heterostructure of sulfide and layered double hydroxide as bifunctional electrocatalyst for overall water splitting. *J. Solid State Electrochem.* **2022**, *27*, 575-583.
- (3) Zhang, T.; Han, J.; Tang, T.; Sun, J.; Guan, J. Binder-free bifunctional SnFe sulfide/oxyhydroxide heterostructure electrocatalysts for overall water splitting. *Int. J. Hydrogen Energy* **2023**, *48*, 4594-4602.
- (4) Shit, S.; Chhetri, S.; Jang, W.; Murmu, N. C.; Koo, H.; Samanta, P.; Kuila, T. Cobalt Sulfide/Nickel Sulfide Heterostructure Directly Grown on Nickel Foam: An Efficient and Durable Electrocatalyst for Overall Water Splitting Application. *ACS Appl. Mater. Interfaces* **2018**, *10* (33), 27712-27722.
- (5) Wang, S.; Xue, W.; Fang, Y.; Li, Y.; Yan, L.; Wang, W.; Zhao, R. Bismuth activated succulent-like binary metal sulfide heterostructure as a binder-free electrocatalyst for enhanced oxygen evolution reaction. *J. Colloid Interface Sci.* **2020**, *573*, 150-157.
- (6) Guo, Y.; Zhou, X.; Tang, J.; Tanaka, S.; Kaneti, Y. V.; Na, J.; Jiang, B.; Yamauchi, Y.; Bando, Y.; Sugahara, Y. Multiscale structural optimization: Highly efficient hollow iron-doped metal sulfide heterostructures as bifunctional electrocatalysts for water splitting. *Nano Energy* **2020**, *75*, 104913.
- (7) Zhang, H.; Tang, H.; Weng, Q.; Wei, Q.; Duan, M.; Bo, X.; Fu, F.; Zan, L. Engineering heterostructure of bimetallic nickel-silver sulfide as an efficient electrocatalyst for overall water splitting in alkaline media. *J. Solid State Chem.* **2022**, *316*, 123556.
- (8) Sun, Z.; Wang, X.; Yuan, M.; Yang, H.; Su, Y.; Shi, K.; Nan, C.; Li, H.; Sun, G.; Zhu, J.; et al. "Lewis Base-Hungry" Amorphous-Crystalline Nickel Borate-Nickel Sulfide Heterostructures by In Situ Structural Engineering as Effective Bifunctional Electrocatalysts toward Overall Water Splitting. *ACS Appl. Mater. Interfaces* **2020**, *12*, 23896-23903.
- (9) Qian, Y.; Yu, J.; Zhang, Y.; Zhang, F.; Kang, Y.; Su, C.; Shi, H.; Kang, D. J.; Pang, H.

Interfacial Microenvironment Modulation Enhancing Catalytic Kinetics of Binary Metal Sulfides Heterostructures for Advanced Water Splitting Electrocatalysts. *Small Methods* **2022**, *6*, e2101186.

(10) Shit, S.; Bolar, S.; Murmu, N. C.; Kuila, T. Minimal lanthanum-doping triggered enhancement in bifunctional water splitting activity of molybdenum oxide/sulfide heterostructure through structural evolution. *Chem. Eng. J.* **2022**, *428*, 131131.

(11) Zhang, K.; Duan, Y.; Graham, N.; Yu, W. Unveiling the synergy of polymorph heterointerface and sulfur vacancy in NiS/Ni<sub>3</sub>S<sub>2</sub> electrocatalyst to promote alkaline hydrogen evolution reaction. *Appl. Catal. B: Environ.* **2023**, *323*, 122144.

(12) Li, M.; Zheng, K.; Zhang, J.; Li, X.; Xu, C. Design and construction of 2D/2D sheet-on-sheet transition metal sulfide/phosphide heterostructure for efficient oxygen evolution reaction. *Appl. Surf. Sci.* **2021**, *565*, 150510

(13) Wang, J.; Guo, Z.; Yu, Y.; Yu, H.; Yang, J.; Luo, Y.; Xue, Y.; Cai, N.; Li, H.; Yu, F. Polysulfide-Induced Synthesis of Hierarchical Ni<sub>3</sub>S<sub>2</sub>/NiCo<sub>2</sub>S<sub>4</sub> Nanorods Supported on Nickel Foam for Boosted Oxygen Evolution Catalysis. *J. Phys. Chem. C* **2023**, *127*, 4808-4815.

(14) Wei, Y.; Li, W.; Li, D.; Yi, L.; Hu, W. Amorphous-crystalline cobalt-molybdenum bimetallic phosphide heterostructured nanosheets as Janus electrocatalyst for efficient water splitting. *Int. J. Hydrogen Energy* **2022**, *47*, 7783-7792.

(15) Tang, W.; Wang, J.; Guo, L.; Teng, X.; Meyer, T. J.; Chen, Z. Heterostructured Arrays of Ni<sub>x</sub>P/S/Se Nanosheets on Co<sub>x</sub>P/S/Se Nanowires for Efficient Hydrogen Evolution. *ACS Appl. Mater. Interfaces* **2017**, *9*, 41347-41353.

(16) Jin, J.; Chen, F.; Feng, Y.; Zhou, J.; Lei, W.; Gao, F. Co-Ni-Mo phosphides hierarchical nanoarrays as bifunctional electrocatalysts for excellent overall water splitting. *Fuel* **2023**, *332*, 126131.

(17) Wang, Z.; Heng, N.; Wang, X.; He, J.; Zhao, Y. Surface and morphology structure evolution of metal phosphide for designing overall water splitting electrocatalyst. *J. Catal.* **2019**, *374*, 51-59.

(18) Niu, Z.; Qiu, C.; Jiang, J.; Ai, L. Hierarchical CoP-FeP Branched Heterostructures for Highly Efficient Electrocatalytic Water Splitting. *ACS Sustainable Chem. Eng.* **2018**, *7* (2), 2335-2342.

(19) Wang, X.; Wang, B.; Chen, Y.; Wang, M.; Wu, Q.; Srinivas, K.; Yu, B.; Zhang, X.; Ma, F.; Zhang, W. Fe<sub>2</sub>P nanoparticles embedded on Ni<sub>2</sub>P nanosheets as highly efficient and stable

bifunctional electrocatalysts for water splitting. *J. Mater. Sci. Technol.* **2022**, *105*, 266-273.

(20) Liu, Y.; Gong, W.; Yao, S.; Liang, Y.; Yang, Y.; Yu, T.; Yuan, C.; Yang, Y. Synergistically Coupling of Manganese-Doped CoP Nanowires Arrays with Highly Dispersed Ni(PO<sub>3</sub>)<sub>2</sub> Nanoclusters toward Efficient Overall Water Splitting. *Inorg. Chem.* **2022**, *61*, 14201-14210.

(21) Han, B.; Du, X.; Li, J.; Wang, H.; Liu, G.; Li, J. Synergistic effect of Cu doping and NiP<sub>x</sub>/NiSe<sub>y</sub> heterostructure construction for boosted water electrolysis. *Appl. Surf. Sci.* **2022**, *604*, 154617.

(22) Sun, Y.; Liu, T.; Li, Z.; Meng, A.; Li, G.; Wang, L.; Li, S. Morphology and interfacial charge regulation strategies constructing 3D flower-like Co@CoP<sub>2</sub> heterostructure electrocatalyst for efficient overall water splitting. *Chem. Eng. J.* **2022**, *433*, 133684.

(23) Shao, Z.; Qi, H.; Wang, X.; Sun, J.; Guo, N.; Huang, K.; Wang, Q. Boosting oxygen evolution by surface nitrogen doping and oxygen vacancies in hierarchical NiCo/NiCoP hybrid nanocomposite. *Electrochim. Acta* **2019**, *296*, 259-267.

(24) Han, W.; Zhang, F.; Qiu, L.; Qian, Y.; Hao, S.; Li, P.; He, Y.; Zhang, X. Interface engineering of hierarchical NiCoP/NiCoS<sub>x</sub> heterostructure arrays for efficient alkaline hydrogen evolution at large current density. *Nanoscale* **2022**, *14*, 15498-15506.

(25) Suo, N.; Dou, Z.; Cui, L. Interface and composition engineering of vanadium doped cobalt nickel sulfide/phosphide heterostructure for efficient water splitting. *Electrochim. Acta* **2021**, *368*, 137602.

(26) Li, K.; Tong, Y.; Feng, D.; Chen, P. Fluorine-anion engineering endows superior bifunctional activity of nickel sulfide/phosphide heterostructure for overall water splitting. *J. Colloid Interface Sci.* **2022**, *625*, 576-584.

(27) Wang, J.; Zhang, M.; Yang, G.; Song, W.; Zhong, W.; Wang, X.; Wang, M.; Sun, T.; Tang, Y. Heterogeneous Bimetallic Mo-NiP<sub>x</sub>/NiS<sub>y</sub> as a Highly Efficient Electrocatalyst for Robust Overall Water Splitting. *Adv. Funct. Mater.* **2021**, *31*, 2101532.

(28) Li, F.; Bu, Y.; Lv, Z.; Mahmood, J.; Han, G. F.; Ahmad, I.; Kim, G.; Zhong, Q.; Baek, J. B. Porous Cobalt Phosphide Polyhedrons with Iron Doping as an Efficient Bifunctional Electrocatalyst. *Small* **2017**, *13*, 1701167.

(29) Xin, Y.; Kan, X.; Gan, L. Y.; Zhang, Z. Heterogeneous Bimetallic Phosphide/Sulfide Nanocomposite for Efficient Solar-Energy-Driven Overall Water Splitting. *ACS Nano* **2017**, *11*,

10303-10312.
